# Supplementary material for: Demographic Characteristics, Survival and Prognostic Factors for Mortality in Cats with Primary Immune‐Mediated Hemolytic Anemia
Source: PubMed Central journal article supplement — J Vet Intern Med. 2015 Dec 9;30(1):147–56. doi: 10.1111/jvim.13658 (PMC4913623; doi:10.1111/jvim.13658), 2015-12-09
Supplement: JVIM-30-147-s001.pdf [file JVIM-30-147-s001.pdf]

**Supplementary Table 1:** Comparisons of hematologic and serum biochemical data from cats with primary IMHA with either regenerative anemia or persistently non-regenerative anemia. Values are median and interquartile range and comparisons are by Mann-Whitney *U* test unless otherwise stated. P values <0.0025 denote significance at the 0.05 level after Bonferroni correction.

| Parameter                                           | Cats with regenerative anemia (n=47) <sup>a</sup> | Cats with non-regenerative anemia (n=16) | P value            |
|-----------------------------------------------------|---------------------------------------------------|------------------------------------------|--------------------|
| Age (years)                                         | 4.3 (2.5-9.9)                                     | 2.8 (1.5-7.3)                            | 0.272              |
| Heart rate (beats per minute)                       | 200 (180-204)                                     | 200 (200-218)                            | 0.339              |
| Respiratory rate (breaths per minute)               | 40 (36-50)                                        | 50 (40-60)                               | 0.244              |
| Rectal temperature (degrees Celsius)                | 38.4 (37.8-39.1)                                  | 38.7 (37.8-39.0)                         | 0.851              |
| Red blood cell concentration (x10 <sup>6</sup> /μl) | 1.94 (1.55-2.38)                                  | 2.26 (1.97-2.43)                         | 0.081              |
| Hematocrit (% , mean and standard error)            | 10.9 (±0.50)                                      | 11.7 (±0.81)                             | 0.403 <sup>b</sup> |
| Mean cell volume (fL)                               | 56.7 (49.3-68.2)                                  | 47.7 (44.9-55.8)                         | 0.036              |
| Mean cell hemoglobin concentration (g/dL)           | 34.5 (32.3-38.6)                                  | 33.9 (32.4-35.1)                         | 0.118              |
| Red cell distribution width (%)                     | 21.9 (19.8-25.9)                                  | 19.1 (17.0-22.5)                         | 0.038              |
| Absolute reticulocyte concentration at              | 69,680 (16,160-161,000)                           | 8,960 (0-22,300)                         | <b>&lt;0.001</b>   |

|                                                             |                  |                  |                    |
|-------------------------------------------------------------|------------------|------------------|--------------------|
| diagnosis (/μl)                                             |                  |                  |                    |
| Total white blood cell concentration (x10 <sup>3</sup> /μl) | 10.7 (7.0-17.5)  | 7.6 (5.6-11.2)   | 0.113              |
| Platelet concentration (x10 <sup>3</sup> /μl)               | 156 (110-276)    | 150 (102-233)    | 0.788              |
| Serum total protein (g/dL)                                  | 7.2 (5.7-8.1)    | 6.8 (6.3-7.7)    | 0.935              |
| Serum albumin (g/dL)                                        | 3.2 (±0.77)      | 3.4 (±1.55)      | 0.320 <sup>b</sup> |
| Serum globulin (g/dL)                                       | 3.8 (2.6-4.9)    | 3.5 (3.0-4.2)    | 0.800              |
| Serum total bilirubin (mg/dL)                               | 0.5 (0.2-1.1)    | 0.1 (0.1-0.3)    | 0.008              |
| Serum urea (mg/dL)                                          | 27.2 (19.9-33.6) | 25.2 (19.3-36.4) | 0.950              |
| Serum creatinine (mg/dL)                                    | 1.2 (1.1-1.4)    | 1.3 (1.1-1.7)    | 0.540              |
| Serum ALT activity (U/l)                                    | 72 (41-162)      | 89 (47-118)      | 0.863              |
| Serum ALP activity (U/l)                                    | 17 (8-29)        | 11 (4-19)        | 0.335              |

a: Not including 3 cats that presented with non-regenerative anemia but died within 5 days, 3 cats that presented with non-regenerative anemia but did not have a blood sample after 5 days to determine whether they were persistently non-regenerative, and 3 cats that did not have a reticulocyte count on presentation.

b: Student's t test

ALT, alanine aminotransferase; ALP, alkaline phosphatase
