# Supplementary material for: Demographic Characteristics, Survival and Prognostic Factors for Mortality in Cats with Primary Immune‐Mediated Hemolytic Anemia
Source: PubMed Central journal article supplement — J Vet Intern Med. 2015 Dec 9;30(1):147–56. doi: 10.1111/jvim.13658 (PMC4913623; doi:10.1111/jvim.13658), 2015-12-09
Supplement: JVIM-30-147-s002.pdf [file JVIM-30-147-s002.pdf]

**Supplementary Table 2:** Starting doses of drugs used in the treatment of primary IMHA in cats.

Numbers of cats differ from those stated in text as bodyweight was not recorded for all cases to enable calculation of dose rates.

| Drug                       |               | Median dose<br>(mg/kg/day) | Inter-quartile<br>range | Number of cats |
|----------------------------|---------------|----------------------------|-------------------------|----------------|
| Glucocorticoid             | Prednisolone  | 3.73                       | 3.38-4.11               | 53             |
|                            | Dexamethasone | 0.25                       |                         | 1              |
| Cytotoxic drug             | Chlorambucil  | 0.48                       | 0.41-0.60               | 18             |
| Calcineurin<br>inhibitor   | Cyclosporine  | 9.57                       | 8.22-10.23              | 9              |
| Tetracycline<br>antibiotic | Doxycycline   | 9.35                       | 9.09-10.20              | 21             |
